# Supplementary material for: The study of Rh(iii) hydroxocomplexes using capillary zone electrophoresis with a UV–Vis detector: the development of the method
Source: Royal Society of Chemistry journal article supplement (doi:10.1039/c9dt01879d), 2019-01-01
Supplement: c9dt01879d1.pdf [file c9dt01879d1.pdf]

### Supporting information

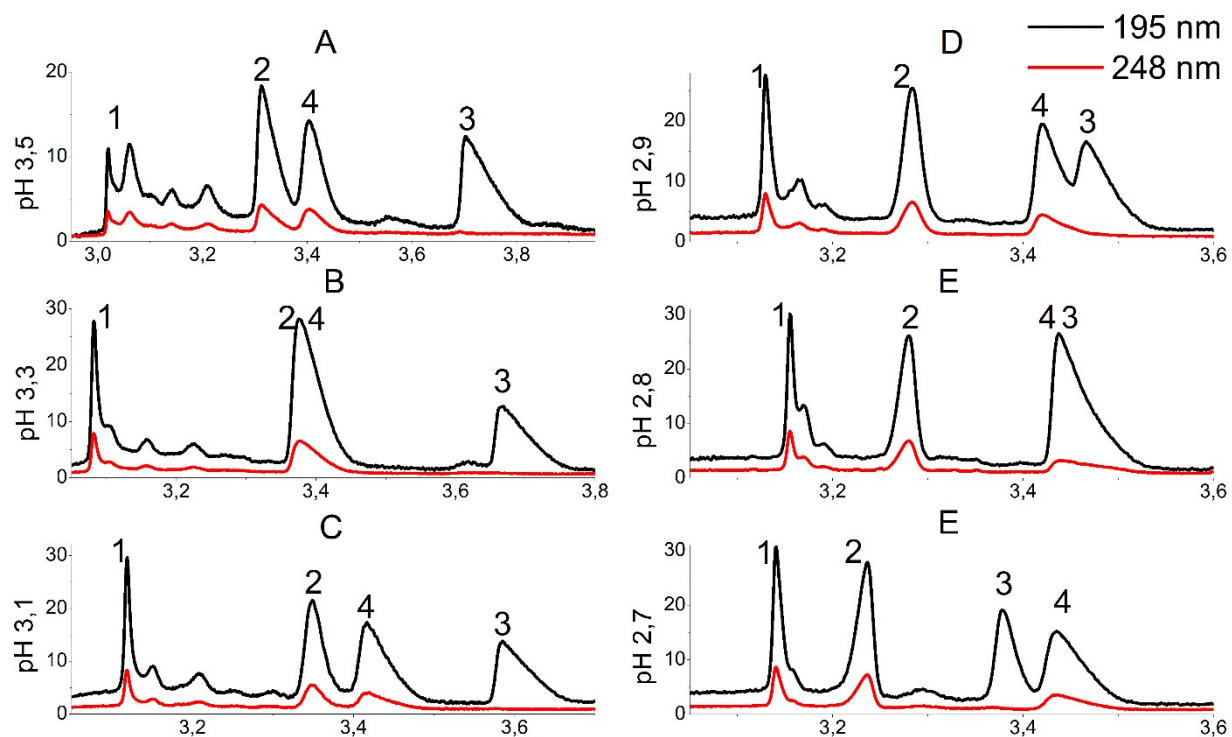

**Fig. S1.** The CZE separations of  $[\text{Rh}_y(\text{OH})_m(\text{H}_2\text{O})_z]^{3y-m}$  complexes within pH range from 3.5 to 2.7
